# Supplementary material for: DNA methylation of the &lt;i&gt;PLIN1&lt;/i&gt; promoter downregulates expression in chicken lines
Source: Copernicus journal article supplement (doi:10.5194/aab-62-375-2019), 2019-07-03

Supplement of Arch. Anim. Breed., 62, 375–382, 2019  
<https://doi.org/10.5194/aab-62-375-2019-supplement>  
© Author(s) 2019. This work is distributed under  
the Creative Commons Attribution 4.0 License.

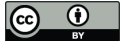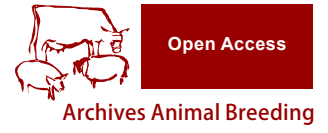

*Supplement of*

## **DNA methylation of the *PLINI* promoter downregulates expression in chicken lines**

**Yuhang Sun et al.**

*Correspondence to:* Yuxiang Wang (wyx2000@neau.edu.cn)

The copyright of individual parts of the supplement might differ from the CC BY 4.0 License.

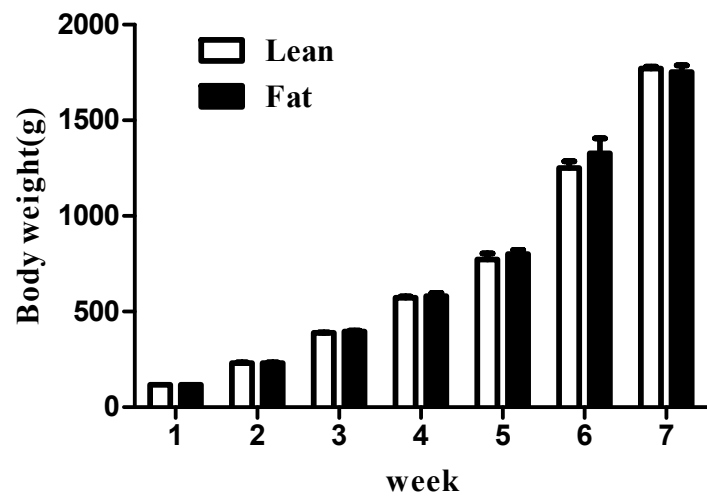

Supplement: Supplementary file [file aab-62-375-2019-supplement.pdf]
